# Supplementary material
Source: PubMed Central journal article supplement (PMC6686979)
Supplement: jamapsychiatry-76-1141-s001.pdf [file jamapsychiatry-76-1141-s001.pdf]

## Supplementary Online Content

Sun S, Kuja-Halkola R, Faraone SV, et al. Association of psychiatric comorbidity with the risk of premature death among children and adults with attention-deficit/hyperactivity disorder. *JAMA Psychiatry*. Published online August 7, 2019. doi:10.1001/jamapsychiatry.2019.1944

**eTable 1.** Definition and Diagnosis Age of Psychiatric Disorders

**eTable 2.** Characteristics of Individuals With and Without ADHD by Sex

**eTable 3.** All-Cause Mortality Rates by Levels of Covariates and Psychiatric Disorders

**eTable 4.** Age at First Diagnosis of ADHD and All-Cause Mortality

**eTable 5.** Association Between ADHD and Cause-Specific Mortality Risks in the Overall Cohort

**eTable 6.** Psychiatric Comorbidity and Cause-Specific Mortality Risks Among Young Adults With ADHD

**eTable 7.** Sensitivity Analysis: Association Between NPR-Diagnosed ADHD and All-Cause Mortality Rates

**eTable 8.** All-Cause Mortality Risks and Number of Psychiatric Comorbidities or Psychotropic Medication Use With ADHD in Young Adults

**eTable 9.** Sensitivity Analysis: Association Between ADHD and Premature Death in Young Adult Men and Women

This supplementary material has been provided by the authors to give readers additional information about their work.

| <b>eTable 1. Definition and Diagnosis Age of Psychiatric Disorders</b> |                         |                           |        |              |                       |
|------------------------------------------------------------------------|-------------------------|---------------------------|--------|--------------|-----------------------|
| Psychiatric and behavior disorders                                     | ICD-10 codes            | Diagnosis age (years old) |        |              | Category for analysis |
|                                                                        |                         | 25% quartile              | Median | 75% quartile |                       |
| ADHD                                                                   | F90, PDR medication use | 9.9                       | 13.8   | 17.7         | Main Exposure         |
| Autism spectrum disorders (ASD)                                        | F84                     | 9.7                       | 13.7   | 17.9         | Early-onset disorder  |
| Intellectual disability (ID)                                           | F7x                     | 8.3                       | 12.3   | 16.3         | Early-onset disorder  |
| Conduct disorders (CD/ODD)                                             | F90.1, F91              | 9.7                       | 13.0   | 15.6         | Early-onset disorder  |
| Eating disorders (ED)                                                  | F50.0-F50.3, F50.9      | 15.3                      | 17.5   | 20.4         | Later-onset disorder  |
| Substance use disorders (SUD)                                          | F10-F16, F18-F19        | 16.7                      | 19.0   | 21.6         | Later-onset disorder  |
| Depressive disorders (Dep)                                             | F32-F34                 | 15.7                      | 18.3   | 21.4         | Later-onset disorder  |
| Bipolar disorders (Bip)                                                | F30-F31                 | 17.5                      | 20.2   | 23.5         | Later-onset disorder  |
| Anxiety disorders (Anx)                                                | F40-F41                 | 16.1                      | 18.8   | 21.9         | Later-onset disorder  |
| Schizophrenia (SCZ)                                                    | F2x                     | 18.4                      | 20.8   | 23.5         | Later-onset disorder  |
| Personality disorder (PD)                                              | F60-F62, F69            | 19.2                      | 21.2   | 23.7         | Later-onset disorder  |

**eTable 2. Psychiatric Disorders in Individuals With and Without ADHD by Sex<sup>a</sup>**

|                           | Total             | ADHD,<br>No. (%) | Non-ADHD,<br>No. (%) |
|---------------------------|-------------------|------------------|----------------------|
| Male                      | 1 374 790 (100.0) | 57 919 (100.0)   | 1 316 871 (100.0)    |
| Autism spectrum disorders | 24 229 (1.8)      | 11 149 (19.3)    | 13 080 (1.0)         |
| Intellectual disorder     | 12 568 (0.9)      | 6 107 (7.1)      | 8 461 (0.6)          |
| Conduct disorders         | 5 929 (0.4)       | 4 202 (7.3)      | 1 727 (0.1)          |
| Eating disorders          | 1 482 (0.1)       | 230 (0.4)        | 1 252 (0.1)          |
| Substance use disorder    | 37 009 (2.7)      | 6 786 (11.7)     | 30 223 (2.3)         |
| Depression                | 29 678 (2.16)     | 7 630 (13.2)     | 22 048 (1.7)         |
| Bipolar disorder          | 3 279 (0.2)       | 1 197 (2.1)      | 2 082 (0.2)          |
| Anxiety disorder          | 29 687 (2.2)      | 7 338 (12.7)     | 22 349 (1.7)         |
| Schizophrenia             | 4 089 (0.3)       | 972 (1.7)        | 3 117 (0.2)          |
| Personality disorder      | 3 625 (0.3)       | 1 279 (2.2)      | 2 346 (0.2)          |
| Female                    | 1 300 825 (100.0) | 28 751 (100.0)   | 1 272 074 (100.0)    |
| Autism spectrum disorders | 10 739 (0.8)      | 4 606 (16.0)     | 6 133 (0.5)          |
| Intellectual disorder     | 8 326 (0.6)       | 1 908 (6.6)      | 6 418 (0.5)          |
| Conduct disorders         | 3 054 (0.2)       | 1 698 (5.9)      | 1 356 (0.1)          |
| Eating disorders          | 18 514 (1.4)      | 1 627 (5.7)      | 16 887 (1.3)         |
| Substance use disorder    | 31 178 (2.4)      | 4 732 (16.5)     | 26 446 (2.1)         |
| Depression                | 50 913 (3.9)      | 8 483 (29.5)     | 42 430 (3.3)         |
| Bipolar disorder          | 7 036 (0.5)       | 2 047 (7.1)      | 4 989 (0.4)          |
| Anxiety disorder          | 53 224 (4.1)      | 9 031 (31.4)     | 44 193 (3.5)         |
| Schizophrenia             | 2 848 (0.2)       | 604 (2.1)        | 2 444 (0.2)          |
| Personality disorder      | 10 012 (0.8)      | 2 635 (9.2)      | 7 377 (0.6)          |

<sup>a</sup> All variables were statistically different between ADHD and non-ADHD group, with p-values<0.0001 by two-sided  $\chi^2$  test.

**eTable 3. All-Cause Mortality Rates by Levels of Covariates and Psychiatric Disorders**

|                                    | Deaths | Person-years at risk | Mortality rate |
|------------------------------------|--------|----------------------|----------------|
| Overall                            | 6655   | 29 237 993           | 2.28           |
| ADHD                               |        |                      |                |
| Yes                                | 424    | 366 332              | 11.57          |
| No                                 | 6 231  | 28 871 661           | 2.16           |
| Sex                                |        |                      |                |
| Male                               | 4378   | 15 033 655           | 2.91           |
| Female                             | 2277   | 14 204 338           | 1.60           |
| Age                                |        |                      |                |
| Childhood                          | 2475   | 19 659 410           | 1.26           |
| Adulthood                          | 4180   | 9 578 583            | 4.36           |
| Year of birth#                     |        |                      |                |
| 1983-1992                          | 4635   | 13 188 501           | 3.51           |
| 1993-2002                          | 1450   | 11 524 829           | 1.26           |
| 2003-2009                          | 570    | 4 524 663            | 1.26           |
| Birth weight                       |        |                      |                |
| <2500                              | 483    | 1 195 009            | 4.04           |
| 2500-3999                          | 4931   | 22 482 143           | 2.19           |
| ≥4000                              | 1241   | 5 560 841            | 2.23           |
| Maternal age at birth <sup>a</sup> |        |                      |                |
| <20                                | 304    | 696 192              | 4.37           |
| 20-29                              | 3930   | 15 870 827           | 2.48           |
| 30-39                              | 2270   | 12 014 862           | 1.89           |
| ≥40                                | 151    | 656 112              | 2.30           |
| Parental education level           |        |                      |                |
| Primary and lower-secondary        | 344    | 964 663              | 3.57           |
| Upper-secondary                    | 2914   | 12 237 350           | 2.38           |
| Post-secondary                     | 2300   | 13 520 237           | 1.70           |
| Postgraduate                       | 1097   | 2 515 743            | 4.36           |
| Parental employment status         |        |                      |                |
| Employed                           | 5918   | 27 603 463           | 2.14           |
| Not employed                       | 737    | 1 634 530            | 4.51           |
| Autism spectrum disorders          | 196    | 154 717              | 12.67          |
| Intellectual disorder              | 336    | 135 413              | 24.81          |
| Conduct disorders                  | 64     | 44 023               | 14.54          |
| Eating disorders                   | 93     | 97 704               | 9.52           |
| Substance use disorder             | 1056   | 330 228              | 31.98          |
| Depression                         | 732    | 340 511              | 21.50          |
| Bipolar disorder                   | 124    | 35 571               | 34.86          |
| Anxiety disorder                   | 726    | 311 910              | 23.28          |
| Schizophrenia                      | 168    | 29 397               | 57.15          |
| Personality disorder               | 250    | 55 441               | 45.09          |

<sup>a</sup> Year of birth and maternal age at birth were analyzed with 1-year intervals in adjusted Cox regression models.

**eTable 4. Age at First Diagnosis of ADHD and All-Cause Mortality**

|         | Age at first ADHD diagnosis <sup>a</sup> | Deaths | Mortality rate<br>(/10 000 person-years) | Model 1 <sup>b</sup><br>HR (95% CI) | Model 2<br>HR (95% CI) |
|---------|------------------------------------------|--------|------------------------------------------|-------------------------------------|------------------------|
| Overall | <=12                                     | 39     | 2.48                                     | 1.50 (1.04-2.17)                    | 1.33 (0.92-1.92)       |
|         | 13-17                                    | 124    | 8.45                                     | 2.69 (2.20-3.31)                    | 2.41 (1.97-2.96)       |
|         | >=18                                     | 261    | 42.06                                    | 10.34 (8.94-11.96)                  | 9.12 (7.88-10.55)      |
|         | Non-ADHD                                 | 6231   | 2.16                                     | 1.0 (reference)                     | 1.0 (reference)        |
| Male    | <=12                                     | 29     | 2.32                                     | 1.62 (1.12-2.34)                    | 1.43 (0.99-2.07)       |
|         | 13-17                                    | 95     | 9.36                                     | 2.60 (2.11-3.19)                    | 2.32 (1.89-2.85)       |
|         | >=18                                     | 200    | 58.53                                    | 9.18 (7.93-10.62)                   | 8.10 (7.00-9.38)       |
|         | Non-ADHD                                 | 4 054  | 2.74                                     | 1.0 (reference)                     | 1.0 (reference)        |
| Female  | <=12                                     | 10     | 3.10                                     | 3.24 (1.74-6.06)                    | 2.86 (1.53-5.33)       |
|         | 13-17                                    | 29     | 6.41                                     | 3.50 (2.42-5.08)                    | 3.17 (2.19-4.59)       |
|         | >=18                                     | 61     | 21.88                                    | 9.13 (7.03-11.87)                   | 8.24 (6.33-10.71)      |
|         | Non-ADHD                                 | 2 177  | 1.54                                     | 1.0 (reference)                     | 1.0 (reference)        |

<sup>a</sup> ADHD treated as time-varying exposure while calculating death counts and mortality rates (per 10 000 person-years).

<sup>b</sup> Model 1 (crude model) adjusted for sex and year of birth; Model 2 (adjusted model) furtherly adjusted for sex and year of birth, birth weight, maternal age at birth, parental education level, and parental employment status. No psychiatric comorbidity adjusted here.

**eTable 5. Association Between ADHD and Cause-Specific Mortality Risks in the Overall Cohort**

| Cause of Death <sup>a</sup> | Deaths (mortality rates) |             |            | Model 1 <sup>b</sup><br>HR (95% CI) | Model 2<br>HR (95% CI) |
|-----------------------------|--------------------------|-------------|------------|-------------------------------------|------------------------|
|                             | Total                    | Non-ADHD    | ADHD       |                                     |                        |
| Unnatural causes            | 3755 (1.28)              | 3409 (1.18) | 346 (9.44) | 7.32 (5.78-9.28)                    | 6.48 (5.12-8.21)       |
| Suicide                     | 1301 (0.44)              | 1168 (0.40) | 133 (3.63) | 9.37 (6.81-12.88)                   | 8.63 (6.27-11.88)      |
| Accidents                   | 1948 (0.67)              | 1796 (0.62) | 152 (4.15) | 4.50 (2.84-7.13)                    | 3.94 (2.49-6.25)       |
| Other external causes       | 486 (0.17)               | 425 (0.15)  | 61 (1.67)  | 8.47 (6.19-11.57)                   | 6.52 (3.68-11.57)      |
| Natural causes              | 2883 (0.99)              | 2805 (0.97) | 78 (2.13)  | 2.71 (1.82-4.04)                    | 2.47 (1.66-3.68)       |

<sup>a</sup> Among the 6 231 deaths in individuals without ADHD, information on death causes was missing for 17 (0.3%) and they were not included in this analysis. ADHD was time-varying exposures while calculating mortality rates (per 10 000 person-years).

<sup>b</sup> Model 1 (crude model) adjusted for year of birth and sex; Model 2 (adjusted model) furtherly adjusted for birth weight, maternal age at birth, parental educational level and parental employment status.

**eTable 6. Psychiatric Comorbidity and Cause-Specific Mortality Risks Among Young Adults With ADHD**

| Death cause   | Comorbidity <sup>a</sup> | Deaths<br>N (%) | Mortality<br>rate | Model 1 <sup>b</sup><br>HR (95% CI) | Model 2<br>HR (95% CI) |
|---------------|--------------------------|-----------------|-------------------|-------------------------------------|------------------------|
| Natural       | Overall                  | 58 (100.0)      | 3.44              | --                                  | --                     |
|               | ADHD only                | 16 (27.6)       | 2.27              | --                                  | --                     |
|               | ADHD +any                | 42 (72.4)       | 4.27              | 1.64 (0.84-3.19)                    | 1.57 (0.80-3.05)       |
|               | ADHD + ASD               | 8 (13.8)        | 3.19              | 0.60 (0.21-1.67)                    | 0.62 (0.22-1.74)       |
|               | ADHD + ID                | 7 (12.1)        | 5.34              | 1.52 (0.60-3.88)                    | 1.49 (0.58-3.80)       |
|               | ADHD + CD/ODD            | NA              | 3.56              | 1.65 (0.59-4.64)                    | 1.48 (0.53-4.18)       |
|               | ADHD + ED                | 5 (8.6)         | 10.54             | 6.00 (0.82-43.67)                   | 5.89 (0.81-42.94)      |
|               | ADHD + SUD               | 26 (44.8)       | 8.07              | 3.52 (1.89-6.59)                    | 3.23 (1.72-6.07)       |
|               | ADHD + Dep               | 18 (31.0)       | 4.42              | 1.15 (0.56-2.36)                    | 1.15 (0.56-2.36)       |
|               | ADHD + Bip               | 5 (8.6)         | 6.22              | 0.67 (0.09-4.91)                    | 0.65 (0.09-4.76)       |
|               | ADHD + Anx               | 16 (27.6)       | 4.28              | 1.29 (0.62-2.68)                    | 1.27 (0.61-2.64)       |
|               | ADHD + SCZ               | 8 (13.8)        | 17.60             | 3.51 (1.36-9.08)                    | 3.39 (1.31-8.78)       |
|               | ADHD + PD                | 11 (19.0)       | 9.93              | 2.98 (1.22-7.28)                    | 2.84 (1.16-6.95)       |
|               | Suicide                  | Overall         | 120               | 7.11                                | --                     |
| ADHD only     |                          | 6 (5.0)         | 0.85              | --                                  | --                     |
| ADHD +any     |                          | 114 (95.0)      | 11.60             | 9.10 (3.95-20.98)                   | 8.96 (3.89-20.66)      |
| ADHD + ASD    |                          | 24 (20.0)       | 9.57              | 1.13 (0.63-2.00)                    | 1.13 (0.64-2.01)       |
| ADHD + ID     |                          | NA              | 0.76              | --                                  | --                     |
| ADHD + CD/ODD |                          | 12 (10.0)       | 10.68             | 1.52 (0.70-3.31)                    | 1.47 (0.68-3.20)       |
| ADHD + ED     |                          | 6 (5.0)         | 12.65             | 2.86 (0.40-20.56)                   | 2.83 (0.39-20.33)      |
| ADHD + SUD    |                          | 82 (68.3)       | 25.44             | 6.65 (4.16-10.62)                   | 6.61 (4.13-10.57)      |
| ADHD + Dep    |                          | 67 (55.8)       | 16.44             | 4.22 (2.71-6.55)                    | 4.20 (2.71-6.53)       |
| ADHD + Bip    |                          | 23 (19.2)       | 28.62             | 6.18 (3.55-10.77)                   | 6.09 (3.49-10.61)      |
| ADHD + Anx    |                          | 78 (65.0)       | 20.87             | 5.84 (3.71-9.17)                    | 5.79 (3.68-9.10)       |
| ADHD + SCZ    |                          | 18 (15.0)       | 39.60             | 3.59 (1.88-6.85)                    | 3.50 (1.84-6.68)       |
| ADHD + PD     |                          | 44 (36.7)       | 39.73             | 6.69 (4.03-11.10)                   | 6.60 (3.97-10.96)      |
| Accident      |                          | Overall         | 133               | 7.88                                | --                     |
|               | ADHD only                | 15 (11.3)       | 2.13              | --                                  | --                     |
|               | ADHD +any                | 118 (88.7)      | 12.01             | 4.90 (2.79-8.62)                    | 4.87 (2.77-8.57)       |
|               | ADHD + ASD               | 15 (11.3)       | 5.98              | 0.69 (0.39-1.24)                    | 0.72 (0.40-1.28)       |
|               | ADHD + ID                | NA <sup>c</sup> | 2.29              | 0.20 (0.05-0.83)                    | 0.20 (0.05-0.80)       |
|               | ADHD + CD/ODD            | 15 (11.3)       | 13.35             | 2.14 (1.20-3.82)                    | 2.08 (1.16-3.72)       |
|               | ADHD + ED                | NA              | 4.22              | --                                  | --                     |
|               | ADHD + SUD               | 99 (74.4)       | 30.71             | 9.98 (6.47-15.39)                   | 10.02 (6.49-15.49)     |
|               | ADHD + Dep               | 48 (36.1)       | 11.78             | 2.04 (1.39-3.01)                    | 2.07 (1.40-3.04)       |
|               | ADHD + Bip               | 10 (7.5)        | 12.44             | 1.64 (0.76-3.54)                    | 1.64 (0.76-3.55)       |
|               | ADHD + Anx               | 65 (48.9)       | 17.39             | 3.97 (2.71-5.82)                    | 3.97 (2.70-5.82)       |
|               | ADHD + SCZ               | 16 (12.0)       | 35.20             | 3.52 (2.02-6.12)                    | 3.50 (2.01-6.09)       |
|               | ADHD + PD                | 27 (20.3)       | 24.38             | 3.62 (2.21-5.92)                    | 3.61 (2.20-5.91)       |

<sup>a</sup> ADHD and comorbid disorders were time-varying exposures while calculating death counts and mortality rates (per 10 000 person-years). ADHD only: ADHD without any comorbidity; ADHD + any: ADHD with any comorbid disorder(s); CD/ODD: conduct disorders including oppositional defiant disorder; ASD: autism spectrum disorders; ID: intellectual disability; ED: eating disorders; SUD: substance use disorders; Dep: depressive disorders; Bip: bipolar disorders; Anx: anxiety disorders; SCZ: schizophrenia disorders; PD: personality disorders.

<sup>b</sup> Model 1 adjusted for year of birth and sex; Model 2 furtherly adjusted for birth weight, maternal age at birth, parental educational level and parental employment status.

<sup>c</sup> NA: Death counts less than 5 were presented as NA (Not Available) for ethical consideration.

| <b>eTable 7. Sensitivity Analysis: Association Between NPR-Diagnosed ADHD<sup>a</sup> and All-Cause Mortality Rates</b> |          |        |              |                                       |                                  |                     |
|-------------------------------------------------------------------------------------------------------------------------|----------|--------|--------------|---------------------------------------|----------------------------------|---------------------|
| Age band (year-old)                                                                                                     | Groups   | Deaths | Person-years | Mortality rate (/10 000 person-years) | Model 1 <sup>b</sup> HR (95% CI) | Model 2 HR (95% CI) |
| Overall                                                                                                                 | ADHD     | 6292   | 299 878      | 12.10                                 | 4.47 (3.96-5.06)                 | 3.95 (3.49-4.47)    |
|                                                                                                                         | Non-ADHD | 363    | 28 938 113   | 2.17                                  | 1.0 (reference)                  | 1.0 (reference)     |
| Childhood                                                                                                               | ADHD     | 31     | 154 153      | 2.01                                  | 1.50 (0.98-2.29)                 | 1.33 (0.87-2.03)    |
|                                                                                                                         | Non-ADHD | 2444   | 19 505 257   | 1.25                                  | 1.0 (reference)                  | 1.0 (reference)     |
| Adulthood                                                                                                               | ADHD     | 332    | 145 727      | 22.78                                 | 5.21 (4.58-5.94)                 | 4.60 (4.04-5.24)    |
|                                                                                                                         | Non-ADHD | 3848   | 9 432 855    | 4.08                                  | 1.0 (reference)                  | 1.0 (reference)     |

<sup>a</sup> Definition of ADHD was first diagnosis recorded in National Patient Register, analyzed as time-varying exposure.  
<sup>b</sup> Model 1 adjusted for year of birth and sex; Model 2 furtherly adjusted for birth weight, maternal age at birth, parental educational level and parental employment status



**eTable 8. All-Cause Mortality Risks and Number of Psychiatric Comorbidities or Psychotropic Medication Use With ADHD in Young Adults**

| Groups                                        | Deaths | Person-years | Mortality rate | Model 1 <sup>b</sup><br>HR (95% CI) | Model 2<br>HR (95% CI) |
|-----------------------------------------------|--------|--------------|----------------|-------------------------------------|------------------------|
| Overall                                       | 3 821  | 16 206 949   | 2.36           | --                                  | --                     |
| ADHD only                                     | 16     | 74 154       | 2.16           | 1.01 (0.61-1.68)                    | 0.92 (0.55-1.53)       |
| ADHD + 1 comorbidity/ medication <sup>a</sup> | 47     | 68 947       | 6.82           | 2.41 (1.78-3.28)                    | 2.15 (1.58-2.92)       |
| ADHD + 2                                      | 66     | 38 306       | 17.23          | 4.83 (3.64-6.42)                    | 4.28 (3.22-5.68)       |
| ADHD + 3                                      | 80     | 19 414       | 41.21          | 11.44 (8.85-14.80)                  | 9.90 (7.65-12.81)      |
| ADHD + 4 or more                              | 160    | 14 175       | 112.88         | 34.41 (28.58-41.42)                 | 29.48 (24.46-35.53)    |
| No above                                      | 3 452  | 15 991 953   | 2.16           | 1.0 (reference)                     | 1.0 (reference)        |

<sup>a</sup> Comorbidity was identified by the first clinical diagnosis in NPR; psychotropic medication use identified as the first prescription in PDR. Comorbidity: Among autism spectrum disorders, intellectual disability, conduct disorders, eating disorders, substance use disorder, depression, bipolar disorder, schizophrenia, anxiety disorder, and personality disorder. ADHD and comorbid disorders were time varying covariates when calculating death counts and mortality rates (per 10 000 person-years). Psychotropic medication: Among antipsychotics (N05A); anxiolytics, hypnotics, and sedatives (N05B or N05C); antidepressants (N06A); antiepileptic drugs (N03A); drugs used in addictive disorders (N07B) and opioid pain medications (N02A).

<sup>b</sup> Model 1 (crude model) adjusted for sex and year of birth; Model 2 (adjusted model) furtherly adjusted for sex and year of birth, birth weight, maternal age at birth, parental education level, and parental employment status.

**eTable 9. Sensitivity Analysis: Association Between ADHD and Premature Death in Young Adult Men and Women**

|              | ADHD  |                             | Non-ADHD |                | Covariate adjustment <sup>a</sup> |                    | Comorbidity adjustment |                  |
|--------------|-------|-----------------------------|----------|----------------|-----------------------------------|--------------------|------------------------|------------------|
|              | Death | Mortality rate <sup>b</sup> | Deaths   | Mortality rate | Model 1                           | Model 2            | Model 3                | Model 4          |
| Death causes | Death | Mortality rate <sup>b</sup> | Deaths   | Mortality rate | HR (95% CI)                       | HR (95% CI)        | HR (95% CI)            | HR (95% CI)      |
| Male         |       |                             |          |                |                                   |                    |                        |                  |
| All-cause    | 286   | 26.24                       | 2 499    | 5.21           | 5.63 (4.97-6.38)                  | 5.00 (4.40-5.67)   | 4.26 (3.70-4.90)       | 1.47 (1.27-1.70) |
| Unnatural    | 244   | 22.38                       | 1 821    | 3.80           | 6.71 (5.85-7.69)                  | 5.87 (5.11-6.74)   | 5.61 (4.82-6.53)       | 1.60 (1.37-1.87) |
| Accident     | 114   | 10.46                       | 898      | 1.87           | 6.69 (5.47-8.17)                  | 5.79 (4.73-7.08)   | 5.91 (4.757.35)        | 2.02 (1.61-2.55) |
| Suicide      | 83    | 7.61                        | 681      | 1.42           | 5.79 (4.58-7.30)                  | 5.26 (4.16-6.66)   | 4.46 (3.42-5.81)       | 1.19 (0.91-1.55) |
| Other        | 47    | 4.31                        | 230      | 0.48           | 9.87 (7.15-13.63)                 | 8.07 (5.81-11.19)  | 8.00 (5.61-11.42)      | 1.69 (1.17-2.43) |
| Natural      | 42    | 3.85                        | 668      | 1.39           | 2.95 (2.15-4.05)                  | 2.72 (1.98-3.74)   | 1.53 (1.08-2.18)       | 1.03 (0.72-1.47) |
| Female       |       |                             |          |                |                                   |                    |                        |                  |
| All-cause    | 83    | 13.91                       | 953      | 2.09           | 7.19 (5.72-9.04)                  | 6.46 (5.13-8.14)   | 3.85 (2.96-5.02)       | 1.25 (0.96-1.62) |
| Unnatural    | 67    | 11.22                       | 567      | 1.25           | 10.43 (8.03-13.53)                | 9.28 (7.13-12.06)  | 6.59 (4.84-8.97)       | 1.38 (1.03-1.85) |
| Accident     | 19    | 3.18                        | 207      | 0.45           | 9.11 (5.62-14.77)                 | 8.06 (4.95-13.12)  | 6.84 (3.96-11.82)      | 2.68 (1.52-4.74) |
| Suicide      | 37    | 6.20                        | 260      | 0.57           | 11.46 (8.04-16.35)                | 10.53 (7.36-15.06) | 6.46 (4.24-10.11)      | 1.16 (0.78-1.70) |
| Other        | 11    | 1.84                        | 98       | 0.22           | 10.03 (5.29-18.99)                | 8.16 (4.28-15.54)  | 6.20 (2.94-13.07)      | 1.16 (0.57-2.35) |
| Natural      | 16    | 2.68                        | 384      | 0.84           | 3.13 (1.89-5.18)                  | 2.86 (1.73-4.75)   | 1.26 (0.73-2.16)       | 1.03 (0.59-1.78) |

<sup>a</sup> Model 1 adjusted for year of birth and sex; Model 2 furtherly adjusted for birth weight, maternal age at birth, parental educational level and parental employment status. In addition to Model 2, Model 3 furtherly adjusted for early-onset disorders including conduct disorders, ASD and intellectual disability disorders; and in addition to Model 3, Model 4 furtherly adjusted for later-onset disorders including substance use disorder, depressive disorders, bipolar disorders, anxiety disorders, schizophrenia, personality disorders and eating disorders.

<sup>b</sup> ADHD and comorbid disorders were time-varying exposures while calculating mortality rates (per 10 000 person-years).
